# Supplementary material for: First-Place Loving and Last-Place Loathing: How Rank in the Distribution of Performance Affects Effort Provision
Source: Atypon-hosted journal article supplement (doi:10.1287/mnsc.2017.2907), 2018-02-13
Supplement: mnsc.2017.2907-sm-data.zip [file RawDataByRound.pdf › GillKissovaLeeProwseDataCode/Figures/RawDataByRound.pdf]

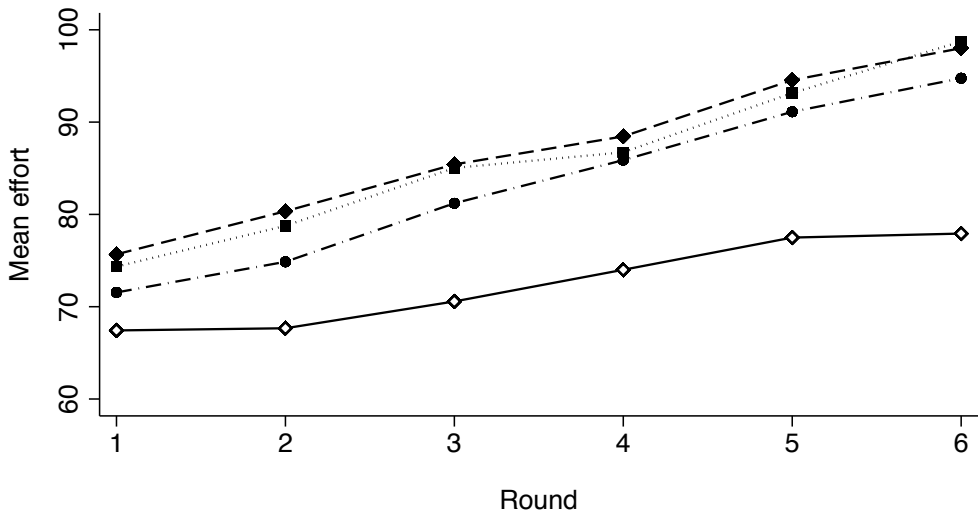

- ◇— Baseline group: No rank-order feedback
- -◆- - Sub-treatment 1: Private computerized rank-order feedback
- -●- - Sub-treatment 2: Experimenter-provided rank-order feedback
- .....■..... Sub-treatment 3: Public rank-order feedback
