# Supplementary material for: First-Place Loving and Last-Place Loathing: How Rank in the Distribution of Performance Affects Effort Provision
Source: Atypon-hosted journal article supplement (doi:10.1287/mnsc.2017.2907), 2018-02-13
Supplement: mnsc.2017.2907-sm-data.zip [file ReadMe.pdf › GillKissovaLeeProwseDataCode/ReadMe.pdf]

Readme file for:  
“First-place Loving and Last-place Loathing:  
How Rank in the Distribution of Performance Affects Effort Provision”  
by Gill, Kissova, Lee and Prowse  
July 27<sup>th</sup>, 2017

The folder that contains this readme file also contains all code and data needed to replicate the empirical analysis in the above paper.

The file Rank\_Data.dta contains the experimental data. The variables are described at the end of this document.

Running the Stata code in the file “RunEstimates.do” replicates the analysis reported in the paper:

- Prior to running this code, line 3 of the code should be updated to point to the folder that contains this readme file
- RunEstimates.do calls “Rank\_VariableGeneration\_250215.do” and “TiesTable.do”
- RunEstimates.do saves figures in the subfolder called “Figures”

## Variable descriptions

treatment – a four-category treatment indicator (c, t1, t2,t3)  
id – a subject-specific ID number  
round – round indicator (round 0 is the practice round, rounds 1-6 are the paying rounds)  
session – session number indicator from 1 to 18  
ReverseRank – subject's rank in a particular round, reverse coded (highest rank = 17; lowest rank = 1)  
RankForPayingRound – subject's rank in a particular round (highest rank = 1; lowest rank = 17)  
SumCorrect – total points score in the round  
SumWrong – total number of incorrect answers in the round  
WordCorrect – score in the word spotting task in the round  
WordWrong – number of incorrect answers in the word spotting task in the round  
NumericalCorrect – score in the numerical task in the round  
NumericalWrong – number of incorrect answers in the numerical task in the round  
Male – indicator of whether subject is male  
Female – indicator of whether subject is female  
MisGender – indicator of missing value for gender  
Age22Plus – indicator of whether subject is 22 or older  
Age22Minus – indicator of whether subject is younger than 22  
MisAge – indicator of missing value for age  
UK – indicator of whether subject was born in the UK  
NUK – indicator of whether subject was born outside of the UK  
MisBirth – indicator of missing value for country of birth  
SC – indicator that subject's main subject of study is in Sciences, Engineering, Math and Medicine  
NSC – indicator that subject's main subject of study is in Humanities, Social Sciences, Business, Law and Education.  
MisStudy – indicator of missing value for main subject of study  
HiComp – indicator that subject self reported as highly competitive (see experimental instructions above for the competitiveness questions)  
ModComp – indicator that subject self reported as moderately competitive  
LoComp – indicator that subject self reported as low competitive  
MisComp – indicator of missing value for competitiveness question
