# Supplementary figures and images for: First-Place Loving and Last-Place Loathing: How Rank in the Distribution of Performance Affects Effort Provision
Source: Atypon-hosted journal article supplement (doi:10.1287/mnsc.2017.2907), 2018-02-13

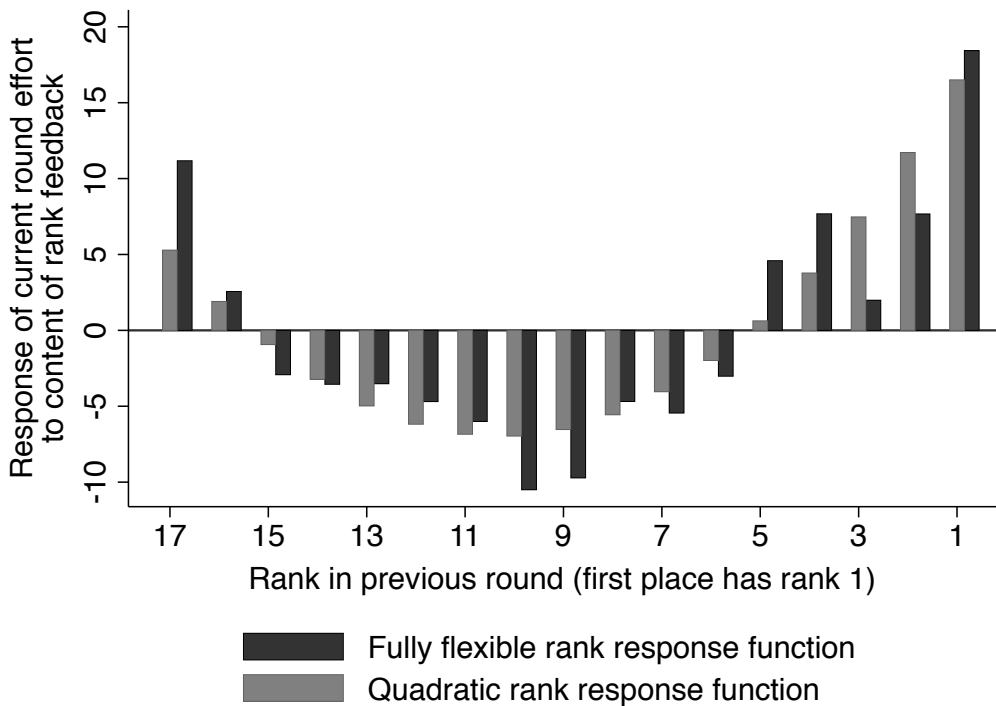

Supplement: mnsc.2017.2907-sm-data.zip [file FFRRFvQuad.pdf › GillKissovaLeeProwseDataCode/Figures/FFRRFvQuad.pdf]

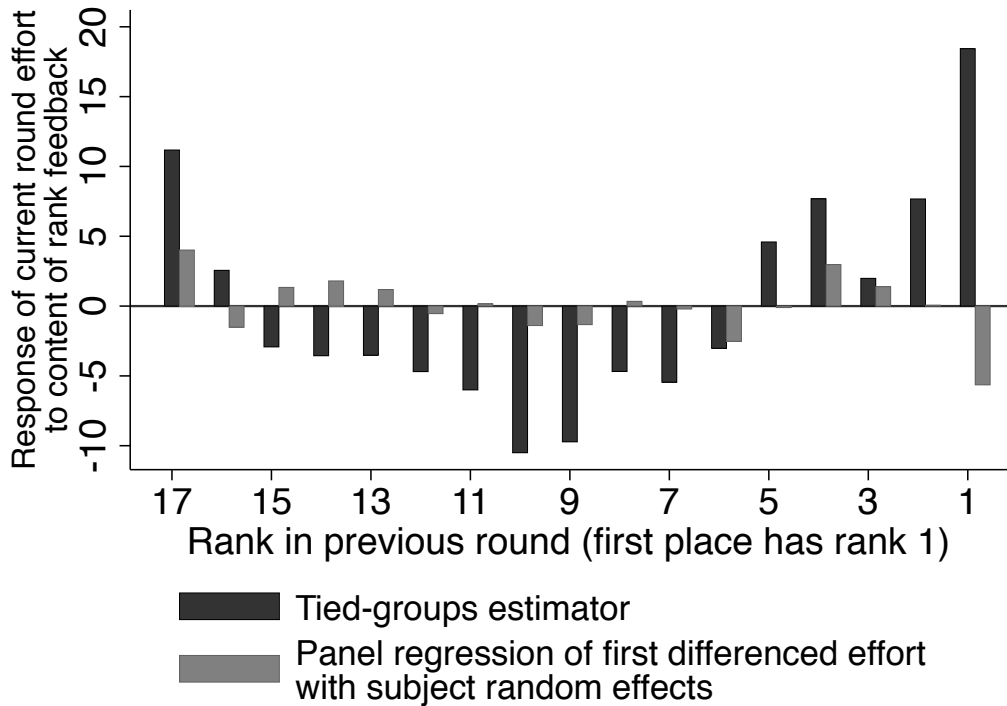

Supplement: mnsc.2017.2907-sm-data.zip [file PrefvChar.pdf › GillKissovaLeeProwseDataCode/Figures/PrefvChar.pdf]

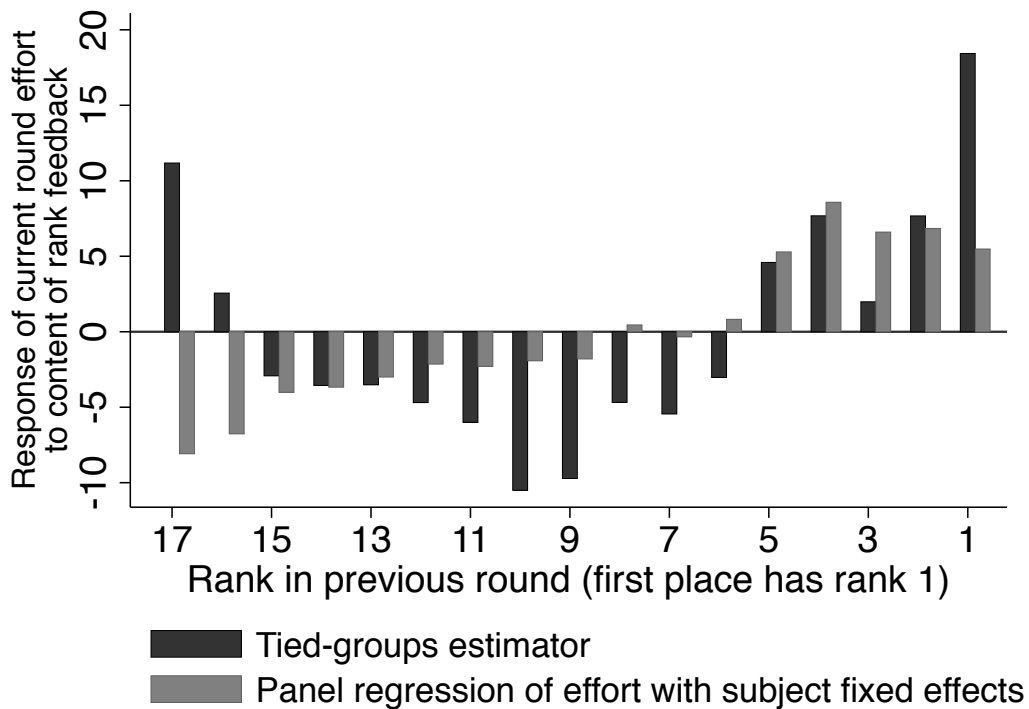

Supplement: mnsc.2017.2907-sm-data.zip [file PrefvFE.pdf › GillKissovaLeeProwseDataCode/Figures/PrefvFE.pdf]

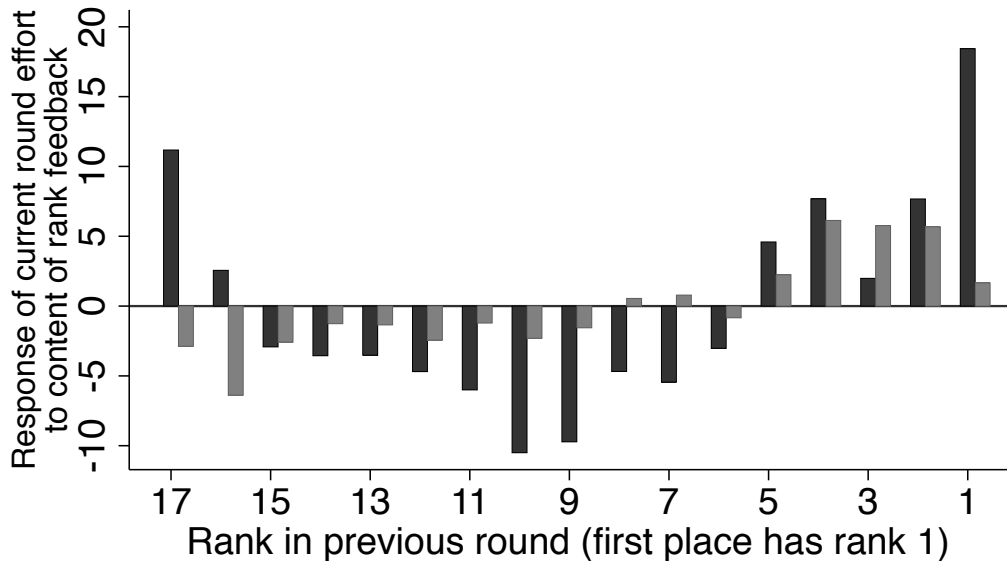

Supplement: mnsc.2017.2907-sm-data.zip [file PrefvLE.pdf › GillKissovaLeeProwseDataCode/Figures/PrefvLE.pdf]

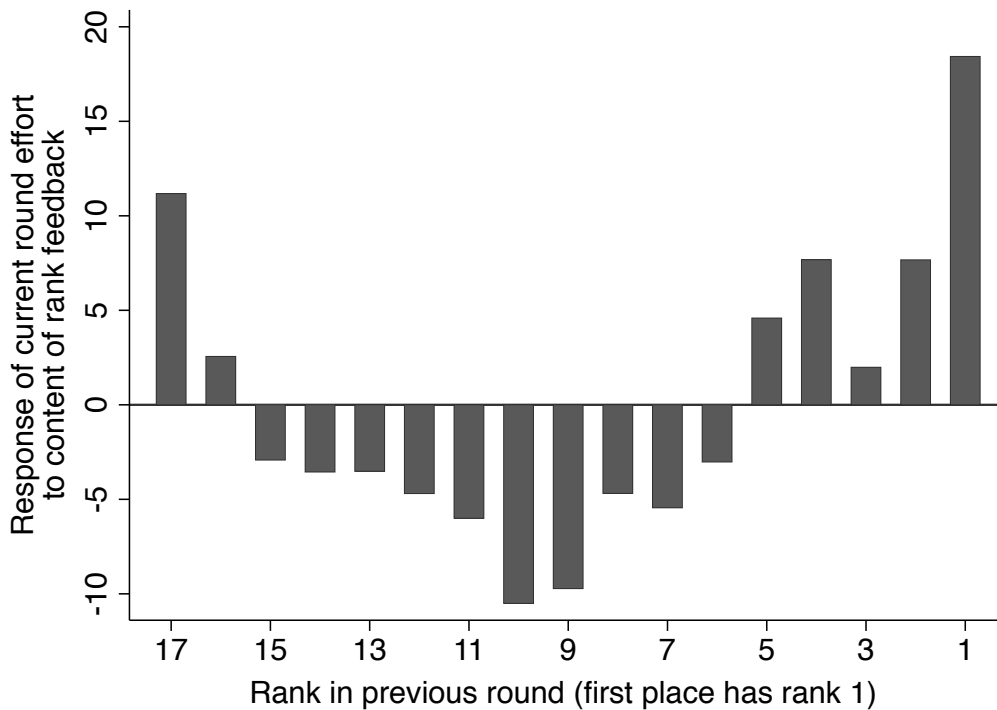

Supplement: mnsc.2017.2907-sm-data.zip [file RRF_FF.pdf › GillKissovaLeeProwseDataCode/Figures/RRF_FF.pdf]

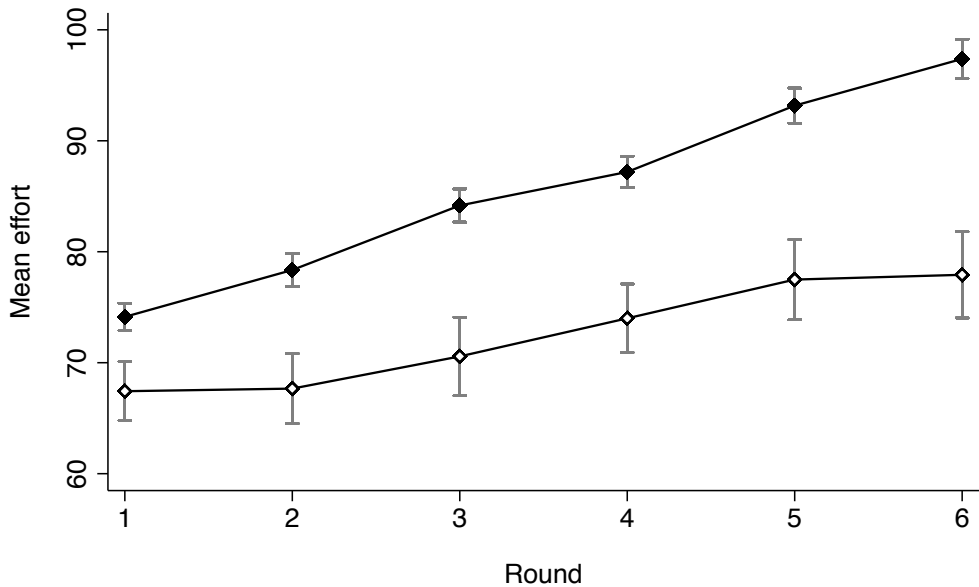

—◇— Baseline group: No rank-order feedback  
—◆— Treatment group: Rank-order feedback

Supplement: mnsc.2017.2907-sm-data.zip [file RawDataByRound_ExtraSD.pdf › GillKissovaLeeProwseDataCode/Figures/RawDataByRound_ExtraSD.pdf]
